# Supplementary material for: A lanthanide-doping route to aspect-ratio-controlled KSc2F7nanocrystals for upconversion, downconversion and magnetism
Source: Royal Society of Chemistry journal article supplement (doi:10.1039/c3tc31608d), 2013-10-31
Supplement: c3tc31608d.pdf [file c3tc31608d.pdf]

Supplementary Material (ESI) for Journal of Materials Chemistry C

This journal is (c) The Royal Society of Chemistry 2013

Electronic Supplementary Information

## Lanthanide-Doping Route to Aspect-Ratio-Controlled $\text{KSc}_2\text{F}_7$ Nanocrystals for Upconversion, Downconversion and Magnetism

Yujie Ding,<sup>ab</sup> Xiaoxia Zhang,<sup>a</sup> Hao Zhu<sup>a</sup> and Jun-Jie Zhu<sup>\*a</sup>

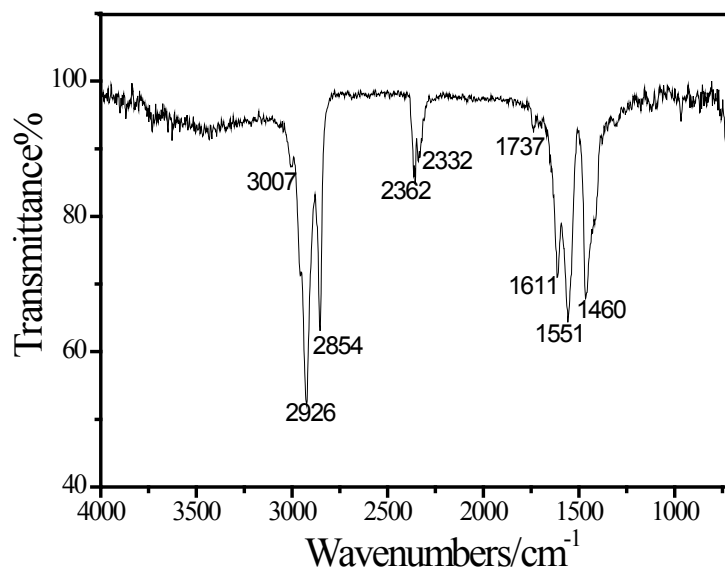

Fig. S1 FT-IR spectrum of the pure  $\text{KSc}_2\text{F}_7$  NCs. As one can see, two peaks at 2926  $\text{cm}^{-1}$  and 2854  $\text{cm}^{-1}$  can be assigned to the asymmetric ( $\nu_{\text{as}}$ ) and symmetric ( $\nu_{\text{s}}$ ) stretching vibration of methylene ( $\text{CH}_2$ ), respectively. In addition, the =C-H stretching mode is located at 3007  $\text{cm}^{-1}$ . The weak absorption peak at 1737  $\text{cm}^{-1}$  is attributed to C=O vibration frequency from the carboxyl of oleic acid. The peaks at 1551  $\text{cm}^{-1}$  and 1460  $\text{cm}^{-1}$  belong to the asymmetric ( $\nu_{\text{as}}$ ) and symmetric ( $\nu_{\text{s}}$ ) stretching vibration of the carboxylic group (-COOH), respectively. It can be concluded that the oleic acid is coordinated to the surface of  $\text{KSc}_2\text{F}_7$  NCs.

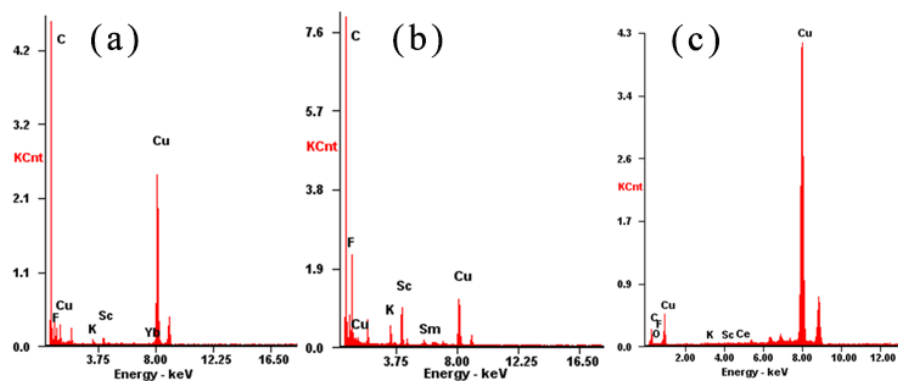

Fig. S2 EDS of (a)  $\text{KSc}_2\text{F}_7$ : 10%  $\text{Yb}^{3+}$ , (b)  $\text{KSc}_2\text{F}_7$ : 10%  $\text{Sm}^{3+}$ , (c)  $\text{KSc}_2\text{F}_7$ : 10%  $\text{Ce}^{3+}$

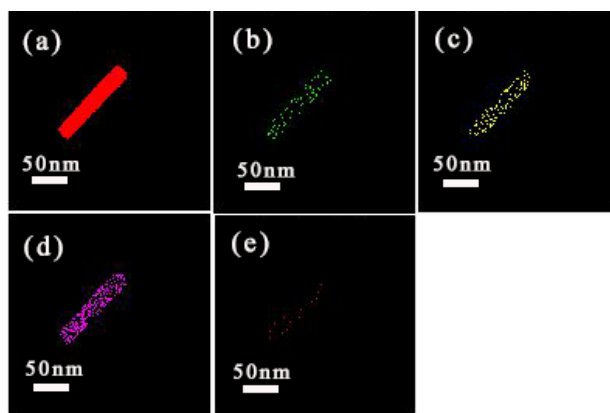

Fig. S3 STEM image of an individual nanorod of sample  $\text{KSc}_2\text{F}_7$ : 10%  $\text{Yb}^{3+}$  NCs (a) and the EDX element mapping of potassium (b), scandium (c), fluorine (d) and ytterbium (e).

Table S1 Compositions of the NCs measured by ICP-MS.

| Sample                                          | Initial doped [ $\text{RE}^{3+}$ ] (at.%) | Doped [ $\text{RE}^{3+}$ ] in NCs (at.%) |
|-------------------------------------------------|-------------------------------------------|------------------------------------------|
| $\text{KSc}_2\text{F}_7$ : 10% $\text{Lu}^{3+}$ | 10                                        | 8.58                                     |
| $\text{KSc}_2\text{F}_7$ : 10% $\text{Yb}^{3+}$ | 10                                        | 8.41                                     |
| $\text{KSc}_2\text{F}_7$ : 10% $\text{Dy}^{3+}$ | 10                                        | 9.03                                     |
| $\text{KSc}_2\text{F}_7$ : 10% $\text{Tb}^{3+}$ | 10                                        | 8.79                                     |
| $\text{KSc}_2\text{F}_7$ : 10% $\text{Eu}^{3+}$ | 10                                        | 9.32                                     |
| $\text{KSc}_2\text{F}_7$ : 10% $\text{Sm}^{3+}$ | 10                                        | 8.96                                     |
| $\text{KSc}_2\text{F}_7$ : 10% $\text{Ce}^{3+}$ | 10                                        | 8.65                                     |
| $\text{KSc}_2\text{F}_7$ : 10% $\text{La}^{3+}$ | 10                                        | 8.36                                     |
| $\text{KSc}_2\text{F}_7$ : 1% $\text{Sm}^{3+}$  | 1                                         | 0.92                                     |
| $\text{KSc}_2\text{F}_7$ : 5% $\text{Sm}^{3+}$  | 5                                         | 4.38                                     |
| $\text{KSc}_2\text{F}_7$ : 20% $\text{Sm}^{3+}$ | 20                                        | 16.87                                    |

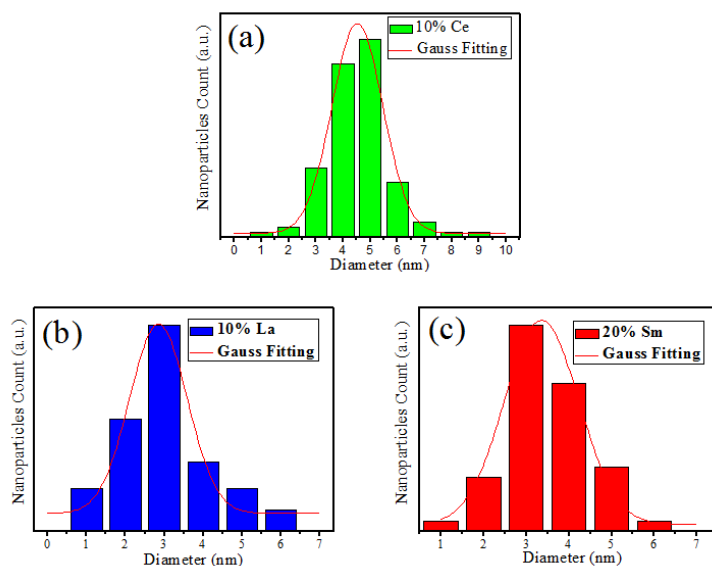

Fig. S4 Histograms of particle size for  $\text{KSc}_2\text{F}_7$  doped with (a) 10%  $\text{Ce}^{3+}$ , (b) 10%  $\text{La}^{3+}$ , (c) 20%  $\text{Sm}^{3+}$ . These data were obtained from the TEM images of more than 300  $\text{KSc}_2\text{F}_7$  NCs. The average sizes for the NCs with 10%  $\text{Ce}^{3+}$ , 10%  $\text{La}^{3+}$  and 20%  $\text{Sm}^{3+}$  doping were found to be about 4.5 (with a standard deviation of 0.9), 3.8 (with a standard deviation of 0.8) and 3.4 (with a standard deviation of 0.9), respectively.

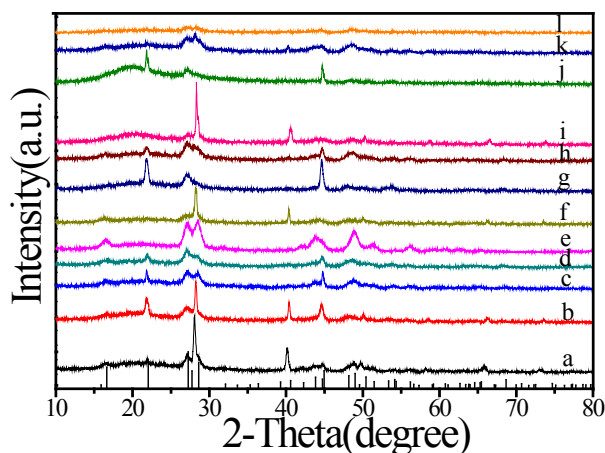

Fig. S5 XRD patterns of the  $\text{KSc}_2\text{F}_7$  NCs. (a)  $\text{KSc}_2\text{F}_7$ : 1%  $\text{Dy}^{3+}$ , (b)  $\text{KSc}_2\text{F}_7$ : 5%  $\text{Dy}^{3+}$ , (c)  $\text{KSc}_2\text{F}_7$ : 10%  $\text{Dy}^{3+}$ , (d)  $\text{KSc}_2\text{F}_7$ : 20%  $\text{Dy}^{3+}$ , (e)  $\text{KSc}_2\text{F}_7$ : 1%  $\text{Tb}^{3+}$ , (f)  $\text{KSc}_2\text{F}_7$ : 5%  $\text{Tb}^{3+}$ , (g)  $\text{KSc}_2\text{F}_7$ : 10%  $\text{Tb}^{3+}$ , (h)  $\text{KSc}_2\text{F}_7$ : 20%  $\text{Tb}^{3+}$ , (i)  $\text{KSc}_2\text{F}_7$ : 1%  $\text{Eu}^{3+}$ , (j)  $\text{KSc}_2\text{F}_7$ : 5%  $\text{Eu}^{3+}$ , (k)  $\text{KSc}_2\text{F}_7$ : 10%  $\text{Eu}^{3+}$ , (l)  $\text{KSc}_2\text{F}_7$ : 20%  $\text{Eu}^{3+}$ . Line pattern (lower part) of the orthorhombic phase  $\text{KSc}_2\text{F}_7$  (JCPDS card 77-1321).

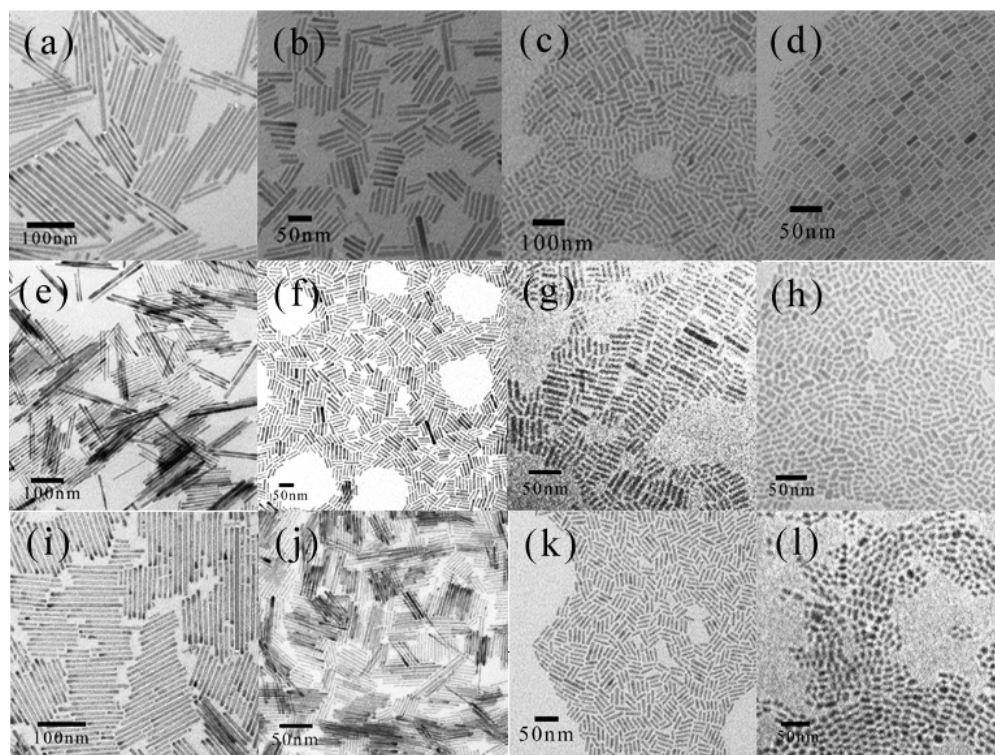

Fig. S6 TEM images of the  $\text{KSc}_2\text{F}_7$  NCs. (a)  $\text{KSc}_2\text{F}_7$ : 1%  $\text{Dy}^{3+}$ , (b)  $\text{KSc}_2\text{F}_7$ : 5%  $\text{Dy}^{3+}$ , (c)  $\text{KSc}_2\text{F}_7$ : 10%  $\text{Dy}^{3+}$ , (d)  $\text{KSc}_2\text{F}_7$ : 20%  $\text{Dy}^{3+}$ , (e)  $\text{KSc}_2\text{F}_7$ : 1%  $\text{Tb}^{3+}$ , (f)  $\text{KSc}_2\text{F}_7$ : 5%  $\text{Tb}^{3+}$ , (g)  $\text{KSc}_2\text{F}_7$ : 10%  $\text{Tb}^{3+}$ , (h)  $\text{KSc}_2\text{F}_7$ : 20%  $\text{Tb}^{3+}$ , (i)  $\text{KSc}_2\text{F}_7$ : 1%  $\text{Eu}^{3+}$ , (j)  $\text{KSc}_2\text{F}_7$ : 5%  $\text{Eu}^{3+}$ , (k)  $\text{KSc}_2\text{F}_7$ : 10%  $\text{Eu}^{3+}$ , (l)  $\text{KSc}_2\text{F}_7$ : 20%  $\text{Eu}^{3+}$ .

Table S2 Length, diameter and aspect ratio from the TEM images in Fig. S6.

| Dopants              | Length (nm) | Diameter (nm) | Aspect Ratio | Dopants              | Length (nm) | Diameter (nm) | Aspect Ratio |
|----------------------|-------------|---------------|--------------|----------------------|-------------|---------------|--------------|
| 1% $\text{Dy}^{3+}$  | 140         | 6             | 23           | 20% $\text{Tb}^{3+}$ | 20          | 8             | 3            |
| 5% $\text{Dy}^{3+}$  | 62          | 7             | 9            | 1% $\text{Eu}^{3+}$  | 115         | 6             | 19           |
| 10% $\text{Dy}^{3+}$ | 57          | 12            | 5            | 5% $\text{Eu}^{3+}$  | 30          | 4             | 7            |
| 20% $\text{Dy}^{3+}$ | 22          | 6             | 4            | 10% $\text{Eu}^{3+}$ | 29          | 7             | 4            |
| 1% $\text{Tb}^{3+}$  | 123         | 6             | 21           | 20% $\text{Eu}^{3+}$ | 15          | 8             | 2            |
| 5% $\text{Tb}^{3+}$  | 48          | 7             | 7            |                      |             |               |              |
| 10% $\text{Tb}^{3+}$ | 35          | 7             | 5            |                      |             |               |              |

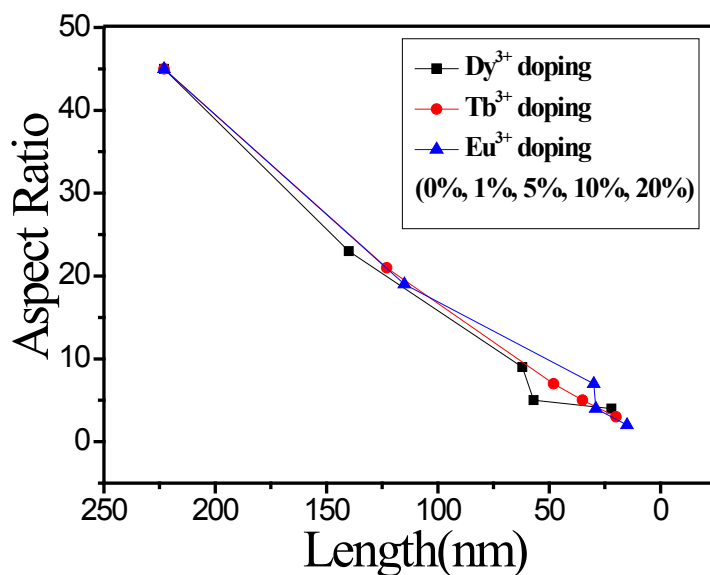

Fig. S7 Graph of aspect ratio versus length for RE<sup>3+</sup>-doped KSc<sub>2</sub>F<sub>7</sub> NCs (RE=Dy, Tb, Eu), the black dots are Dy<sup>3+</sup>-doped KSc<sub>2</sub>F<sub>7</sub> NCs, the red dots are Tb<sup>3+</sup>-doped KSc<sub>2</sub>F<sub>7</sub> NCs, the blue dots are Eu<sup>3+</sup>-doped KSc<sub>2</sub>F<sub>7</sub> NCs. (Each from left to right is 0%, 1%, 5%, 10% and 20% doping, respectively ).

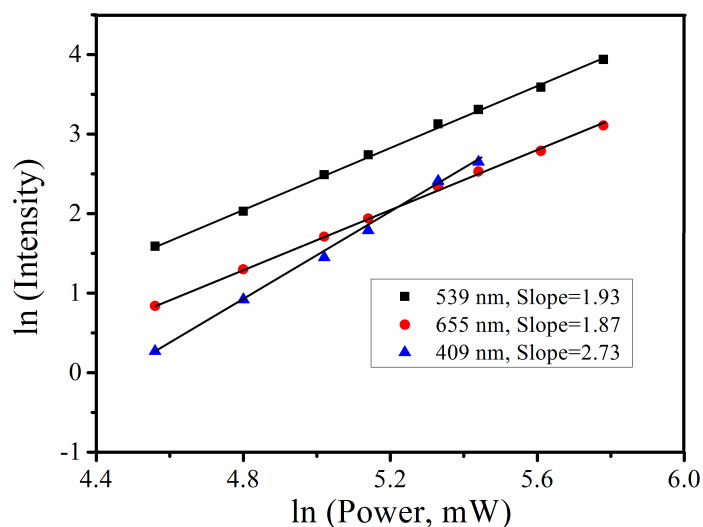

Fig. S8 Power dependence study of the UC emission of the KSc<sub>2</sub>F<sub>7</sub>: 10% Yb<sup>3+</sup>, 1% Ho<sup>3+</sup>, 10% Gd<sup>3+</sup> NCs. Graph of ln(Intensity) versus ln(Power, mW) for the UC emission of Ho<sup>3+</sup> is drawn. We can speculate that the 539 nm, 655 nm and 409 nm emissions of Ho<sup>3+</sup> come from two-, two- and three-photon UC processes, respectively.

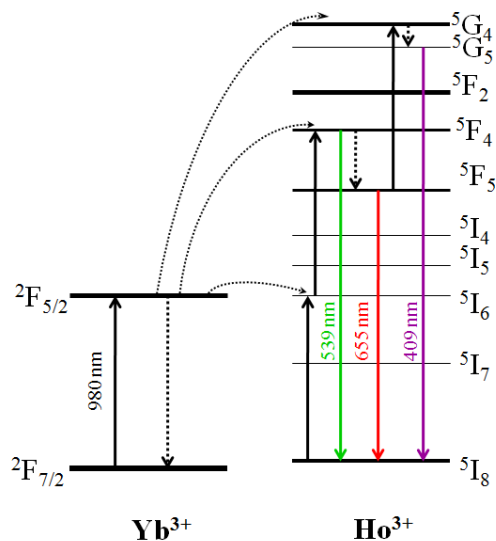

Fig. S9 Energy level diagram of  $\text{Yb}^{3+}$  ions and  $\text{Ho}^{3+}$  ions as well as UC emission mechanism in  $\text{KSc}_2\text{F}_7$ : 10%  $\text{Yb}^{3+}$ , 1%  $\text{Ho}^{3+}$ , 10%  $\text{Gd}^{3+}$  NCs. The excitation from the 980 nm laser is absorbed by  $\text{Yb}^{3+}$  ions, the electrons of  $\text{Ho}^{3+}$  ions are first excited from the  $^5\text{I}_8$  ground-state to the  $^5\text{I}_6$  level via excitation energy transfer from  $\text{Yb}^{3+}$  to  $\text{Ho}^{3+}$  ions, and then to the  $^5\text{F}_4$  level by absorbing the energy of another electron from  $\text{Yb}^{3+}$  ions ( $^2\text{F}_{5/2}$ ), hence, the green  $^5\text{F}_4 - ^5\text{I}_8$  emission (539 nm) occurs. The excited electrons of the  $^5\text{F}_4$  ( $\text{Ho}^{3+}$ ) level decay to the emitting  $^5\text{F}_5$  level, mainly through nonradiative process, and the red  $^5\text{F}_5 \rightarrow ^5\text{I}_8$  emission (655 nm) occurs. The electrons of the  $\text{Ho}^{3+}$  in the  $^5\text{F}_5$  excited state populate the  $^5\text{G}_4$  level through a third 980 nm photon, and decay to the emitting  $^5\text{G}_5$  level, leading to the purple emission of  $^5\text{G}_5 - ^5\text{I}_8$  (409 nm).

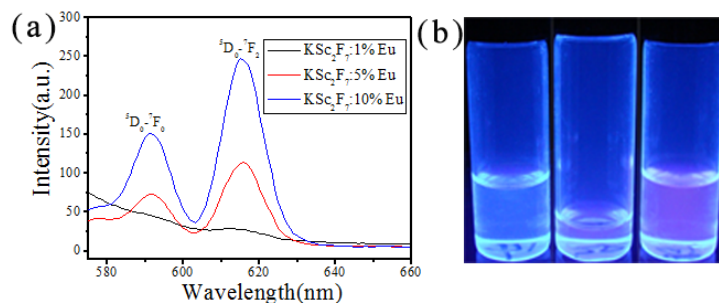

Fig. S10 (a) DC luminescence spectra of  $\text{KSc}_2\text{F}_7$ : x%  $\text{Eu}^{3+}$ . Black line is 1%  $\text{Eu}^{3+}$  doping, red line is 5%  $\text{Eu}^{3+}$  doping, blue line is 10%  $\text{Eu}^{3+}$  doping. (b) DC luminescence photography of  $\text{KSc}_2\text{F}_7$ : x%  $\text{Eu}^{3+}$  NCs under 265 nm excitation. One by one from left to right is 1%  $\text{Eu}^{3+}$ , 5%  $\text{Eu}^{3+}$ , 10%  $\text{Eu}^{3+}$ -doping, respectively.
